# Supplementary material for: Regulation of Gene Expression of phiEco32-like Bacteriophage 7-11
Source: MDPI journal article supplement (doi:10.3390/v14030555), 2022-03-08
Supplement: s1 [file s1]

## **Supplementary data**

### **Regulation of Gene Expression of phiEco32-like Bacteriophage 7-11**

Daria Lavysh <sup>1,\*</sup>, Vladimir Mekler <sup>2</sup>, Evgeny Klimuk <sup>1</sup> and Konstantin Severinov <sup>1,2,3,\*</sup>

<sup>1</sup>Institute of Molecular Genetics of National Research Centre «Kurchatov Institute», 123182 Moscow, Russia

<sup>2</sup>Waksman Institute for Microbiology and Department of Molecular Biology and Biochemistry, Rutgers, State University of New Jersey, Piscataway, NJ 08854, USA

<sup>3</sup>Skolkovo Institute of Science and Technology, Center for Life Sciences, 121205 Skolkovo, Russia

**Supplementary Table S1. Primers used for transcription and primer extension experiments.**

Number “x” in a primer name “Px” indicates primers used to obtain a PCR fragment, containing SaPh711\_gp47-promoter x. Primers named “Px\_pe” were also used for primer extension reactions. Primers labeled as “s70\_” correspond to  $\sigma^{70}$  promoters.

| Primer          | sequence                       |
|-----------------|--------------------------------|
| P1              | GAT ATC CCA TCT ATC AGT GT     |
| P1_pe           | CCT GCT GTA TTA CCC TTG        |
| P8              | GCG TAA TTC CTT CAA TTT CC     |
| P8_pe           | AAG GTC GTA AGA AAC TAA AGT AG |
| P16             | CAT CCG ACT ACT CCT TAA G      |
| P16_pe          | ACA TAG GTA TTG AGA CCC AC     |
| P22             | ACC TAG TGA CCA AGA CCA GC     |
| P22_pe          | GAA CGG AGT TGA TTC ATG CG     |
| P28             | AGG GTG TCA GAG ACC TCA GC     |
| P28_pe          | AGT TGC GTT CCC AGA AGT CTT TA |
| P48             | CAT TTG CCG GTG ATT TC         |
| P48_pe          | CGC GCA TCA TAT ACA TCG        |
| P69             | TAA TGT ATC GTC GAG TCA CAC GC |
| P69_pe          | CGT CAC GCA TTT TAA AAC ACC    |
| s70_P151_1      | TAC AAA CCC TTG TAC TAG TG     |
| s70_P151_1_pe   | TAA GAA ACA ACG TTT CGA AC     |
| s70_P151_2,3    | ATA TTC AAT TCA TCG GGA GG     |
| s70_P151_2,3_pe | ACC TAT TTA CTA ACA TCG CC     |
| s70_P42         | GGC TAA AGT TGT CGA TGT TG     |
| s70_P42_pe      | GCG GCC AGA AGA ACA T          |
| s70_P99         | CCT TGA AAG GTC CGT AGT C      |

|               |                               |
|---------------|-------------------------------|
| s70_P99_pe    | GGT AGC ACG ACC GAT TAC       |
| S.N._PompX_pe | AAC AGA ACG TTT CCA TAT CG    |
| gp47_pe       | GTT TTC TTA GGA GTT GGA GCA C |

**Supplementary Table S2. List of all homologues genes among phiEco32-like phages.**

The result of searchers of core genes of the phiEco32 subgroup phages and core genes of the 7-11 subgroup of phages are presented.

| 7-11          | GAP52      | phiEco32  | NJ01      | KBNP1711   | ECBP2      | SU10     | 172-1    |
|---------------|------------|-----------|-----------|------------|------------|----------|----------|
| NC_015938     | NC_019402  | NC_010324 | NC_018835 | KF981730   | NC_018859  | KM044272 | KP308307 |
| SaPh711_gp001 | D858_gp001 | phi32_6   | NJ01_016  | ECBP3_0004 | ECBP2_0004 | SU10_04  | 1721_23  |
| SaPh711_gp004 | D858_gp112 | phi32_7   | NJ01_017  | ECBP3_0005 | ECBP2_0005 | SU10_05  | 1721_24  |
| SaPh711_gp005 | D858_gp111 | phi32_8   | NJ01_018  | ECBP3_0006 | ECBP2_0006 | SU10_06  | 1721_25  |
| SaPh711_gp007 | D858_gp108 | phi32_10  | NJ01_020  | ECBP3_0008 | ECBP2_0008 | SU10_08  | 1721_27  |
| SaPh711_gp012 | D858_gp102 | phi32_13  | NJ01_023  | ECBP3_0011 | ECBP2_0011 | SU10_11  | 1721_30  |
| SaPh711_gp021 | D858_gp093 | phi32_14  | NJ01_024  | ECBP3_0012 | ECBP2_0012 | SU10_12  | 1721_31  |
| SaPh711_gp017 | D858_gp097 | phi32_18  | NJ01_028  | ECBP3_0016 | ECBP2_0016 | SU10_16  | 1721_35  |
| SaPh711_gp018 | D858_gp096 | phi32_19  | NJ01_029  | ECBP3_0017 | ECBP2_0017 | SU10_17  | 1721_36  |
| SaPh711_gp020 | D858_gp094 | phi32_24  | NJ01_034  | ECBP3_0022 | ECBP2_0022 | SU10_22  | 1721_41  |
| SaPh711_gp024 | D858_gp090 | phi32_26  | NJ01_038  | ECBP3_0024 | ECBP2_0024 | SU10_24  | 1721_43  |
| SaPh711_gp045 | D858_gp075 | phi32_33  | NJ01_043  | ECBP3_0029 | ECBP2_0028 | SU10_29  | 1721_49  |
| SaPh711_gp047 | D858_gp073 | phi32_36  | NJ01_046  | ECBP3_0032 | ECBP2_0031 | SU10_32  | 1721_52  |
| SaPh711_gp048 | D858_gp072 | phi32_40  | NJ01_049  | ECBP3_0036 | ECBP2_0035 | SU10_37  | 1721_55  |
| SaPh711_gp068 | D858_gp061 | phi32_58  | NJ01_067  | ECBP3_0056 | ECBP2_0054 | SU10_56  | 1721_72  |
| SaPh711_gp079 | D858_gp050 | phi32_65  | NJ01_077  | ECBP3_0065 | ECBP2_0061 | SU10_64  | 1721_82  |
| SaPh711_gp073 | D858_gp052 | phi32_67  | NJ01_081  | ECBP3_0069 | ECBP2_0065 | SU10_66  | 1721_86  |
| SaPh711_gp086 | D858_gp044 | phi32_77  | NJ01_092  | ECBP3_0080 | ECBP2_0075 | SU10_78  | 1721_97  |
| SaPh711_gp099 | D858_gp036 | phi32_80  | NJ01_096  | ECBP3_0083 | ECBP2_0079 | SU10_82  | 1721_100 |
| SaPh711_gp101 | D858_gp034 | phi32_82  | NJ01_098  | ECBP3_0085 | ECBP2_0081 | SU10_84  | 1721_102 |
| SaPh711_gp102 | D858_gp033 | phi32_83  | NJ01_099  | ECBP3_0086 | ECBP2_0082 | SU10_85  | 1721_103 |
| SaPh711_gp103 | D858_gp032 | phi32_84  | NJ01_100  | ECBP3_0087 | ECBP2_0083 | SU10_86  | 1721_104 |
| SaPh711_gp104 | D858_gp031 | phi32_85  | NJ01_101  | ECBP3_0088 | ECBP2_0084 | SU10_87  | 1721_105 |
| SaPh711_gp105 | D858_gp030 | phi32_86  | NJ01_102  | ECBP3_0089 | ECBP2_0085 | SU10_88  | 1721_106 |

|          |          |            |            |          |          |
|----------|----------|------------|------------|----------|----------|
| phi32_4  | NJ01_004 | ECBP3_0002 | ECBP2_0002 | SU10_02  | 1721_21  |
| phi32_5  | NJ01_015 | ECBP3_0003 | ECBP2_0003 | SU10_03  | 1721_22  |
| phi32_9  | NJ01_019 | ECBP3_0007 | ECBP2_0007 | SU10_07  | 1721_26  |
| phi32_12 | NJ01_022 | ECBP3_0010 | ECBP2_0010 | SU10_10  | 1721_29  |
| phi32_15 | NJ01_025 | ECBP3_0013 | ECBP2_0013 | SU10_13  | 1721_32  |
| phi32_16 | NJ01_026 | ECBP3_0014 | ECBP2_0014 | SU10_14  | 1721_33  |
| phi32_21 | NJ01_031 | ECBP3_0019 | ECBP2_0019 | SU10_19  | 1721_38  |
| phi32_23 | NJ01_033 | ECBP3_0021 | ECBP2_0021 | SU10_21  | 1721_40  |
| phi32_30 | NJ01_041 | ECBP3_0027 | ECBP2_0026 | SU10_27  | 1721_47  |
| phi32_32 | NJ01_042 | ECBP3_0028 | ECBP2_0027 | SU10_28  | 1721_48  |
| phi32_38 | NJ01_047 | ECBP3_0034 | ECBP2_0033 | SU10_34  | 1721_53  |
| phi32_42 | NJ01_050 | ECBP3_0037 | ECBP2_0036 | SU10_39  | 1721_56  |
| phi32_44 | NJ01_054 | ECBP3_0040 | ECBP2_0039 | SU10_42  | 1721_60  |
| phi32_47 | NJ01_057 | ECBP3_0044 | ECBP2_0043 | SU10_45  | 1721_62  |
| phi32_48 | NJ01_058 | ECBP3_0045 | ECBP2_0044 | SU10_46  | 1721_63  |
| phi32_49 | NJ01_059 | ECBP3_0046 | ECBP2_0045 | SU10_47  | 1721_64  |
| phi32_54 | NJ01_063 | ECBP3_0053 | ECBP2_0051 | SU10_52  | 1721_68  |
| phi32_56 | NJ01_065 | ECBP3_0054 | ECBP2_0052 | SU10_53  | 1721_70  |
| phi32_57 | NJ01_066 | ECBP3_0055 | ECBP2_0053 | SU10_54  | 1721_71  |
| phi32_66 | NJ01_079 | ECBP3_0067 | ECBP2_0063 | SU10_65  | 1721_84  |
| phi32_69 | NJ01_083 | ECBP3_0071 | ECBP2_0067 | SU10_68  | 1721_88  |
| phi32_70 | NJ01_084 | ECBP3_0072 | ECBP2_0068 | SU10_69  | 1721_89  |
| phi32_73 | NJ01_088 | ECBP3_0076 | ECBP2_0071 | SU10_73  | 1721_93  |
| phi32_76 | NJ01_091 | ECBP3_0079 | ECBP2_0074 | SU10_77  | 1721_96  |
| phi32_78 | NJ01_094 | ECBP3_0081 | ECBP2_0077 | SU10_80  | 1721_98  |
| phi32_79 | NJ01_095 | ECBP3_0082 | ECBP2_0078 | SU10_81  | 1721_99  |
| phi32_81 | NJ01_097 | ECBP3_0084 | ECBP2_0080 | SU10_83  | 1721_101 |
| phi32_87 | NJ01_103 | ECBP3_0090 | ECBP2_0086 | SU10_089 | 1721_107 |
| phi32_88 | NJ01_104 | ECBP3_0091 | ECBP2_0087 | SU10_090 | 1721_108 |

|               |            |           |          |            |            |          |          |
|---------------|------------|-----------|----------|------------|------------|----------|----------|
|               |            | phi32_89  | NJ01_105 | ECBP3_0092 | ECBP2_0088 | SU10_091 | 1721_109 |
|               |            | phi32_90  | NJ01_106 | ECBP3_0093 | ECBP2_0089 | SU10_092 | 1721_110 |
|               |            | phi32_93  | NJ01_108 | ECBP3_0096 | ECBP2_0091 | SU10_094 | 1721_112 |
|               |            | phi32_94  | NJ01_109 | ECBP3_0097 | ECBP2_0093 | SU10_095 | 1721_113 |
|               |            | phi32_95  | NJ01_110 | ECBP3_0095 | ECBP2_0095 | SU10_096 | 1721_114 |
|               |            | phi32_101 | NJ01_115 | ECBP3_0101 | ECBP2_0101 | SU10_100 | 1721_120 |
|               |            | phi32_107 | NJ01_123 | ECBP3_0107 | ECBP2_0104 | SU10_105 | 1721_127 |
|               |            | phi32_108 | NJ01_124 | ECBP3_0108 | ECBP2_0105 | SU10_106 | 1721_128 |
|               |            | phi32_112 | NJ01_130 | ECBP3_0112 | ECBP2_0108 | SU10_110 | 1721_2   |
|               |            | phi32_114 | NJ01_133 | ECBP3_0114 | ECBP2_0109 | SU10_112 | 1721_5   |
|               |            | phi32_115 | NJ01_134 | ECBP3_0115 | ECBP2_0110 | SU10_113 | 1721_6   |
|               |            | phi32_116 | NJ01_136 | ECBP3_0116 | ECBP2_0113 | SU10_115 | 1721_8   |
|               |            | phi32_120 | NJ01_001 | ECBP3_0119 | ECBP2_0115 | SU10_117 | 1721_12  |
|               |            | phi32_123 | NJ01_004 | ECBP3_0121 | ECBP2_0117 | SU10_119 | 1721_15  |
|               |            | phi32_124 | NJ01_005 | ECBP3_0122 | ECBP2_0118 | SU10_120 | 1721_16  |
|               |            | phi32_127 | NJ01_009 | ECBP3_0125 | ECBP2_0119 | SU10_124 | 1721_19  |
|               |            | phi32_128 | NJ01_010 | ECBP3_0126 | ECBP2_0120 | SU10_125 | 1721_20  |
| SaPh711_gp008 | D858_gp107 | phi32_11  |          |            |            |          |          |
| SaPh711_gp023 | D858_gp091 | phi32_25  |          |            |            |          |          |
| SaPh711_gp097 | D858_gp039 | phi32_29  |          |            |            |          |          |
| SaPh711_gp053 | D858_gp067 | phi32_43  |          |            |            |          |          |
| SaPh711_gp063 | D858_gp064 | phi32_53  |          |            |            |          |          |
| SaPh711_gp078 | D858_gp051 | phi32_68  |          |            |            |          |          |
| SaPh711_gp081 | D858_gp049 | phi32_72  |          |            |            |          |          |
| SaPh711_gp082 | D858_gp047 | phi32_74  |          |            |            |          |          |
| SaPh711_gp084 | D858_gp046 | phi32_75  |          |            |            |          |          |
| SaPh711_gp111 | D858_gp023 | phi32_117 |          |            |            |          |          |
| SaPh711_gp037 | -          | phi32_35  |          |            |            |          |          |
| SaPh711_gp052 | -          | phi32_47  |          |            |            |          |          |

|               |            |           |
|---------------|------------|-----------|
| SaPh711_gp080 | -          | phi32_60  |
| SaPh711_gp076 | -          | phi32_61  |
| SaPh711_gp074 | -          | phi32_64  |
| SaPh711_gp113 | -          | phi32_92  |
| SaPh711_gp116 | -          | phi32_99  |
| SaPh711_gp135 | -          | phi32_112 |
| SaPh711_gp003 | D858_gp113 | -         |
| SaPh711_gp006 | D858_gp109 | -         |
| SaPh711_gp009 | D858_gp106 | -         |
| SaPh711_gp010 | D858_gp104 | -         |
| SaPh711_gp011 | D858_gp103 | -         |
| SaPh711_gp013 | D858_gp101 | -         |
| SaPh711_gp014 | D858_gp100 | -         |
| SaPh711_gp015 | D858_gp099 | -         |
| SaPh711_gp016 | D858_gp098 | -         |
| SaPh711_gp019 | D858_gp095 | -         |
| SaPh711_gp022 | D858_gp092 | -         |
| SaPh711_gp028 | D858_gp086 | -         |
| SaPh711_gp029 | D858_gp087 | -         |
| SaPh711_gp030 | D858_gp088 | -         |
| SaPh711_gp033 | D858_gp082 | -         |
| SaPh711_gp040 | D858_gp081 | -         |
| SaPh711_gp041 | D858_gp058 | -         |
| SaPh711_gp042 | D858_gp078 | -         |
| SaPh711_gp043 | D858_gp077 | -         |
| SaPh711_gp044 | D858_gp076 | -         |
| SaPh711_gp046 | D858_gp074 | -         |
| SaPh711_gp049 | D858_gp070 | -         |
| SaPh711_gp050 | D858_gp069 | -         |

|               |            |   |
|---------------|------------|---|
| SaPh711_gp064 | D858_gp063 | - |
| SaPh711_gp065 | D858_gp062 | - |
| SaPh711_gp069 | D858_gp059 | - |
| SaPh711_gp071 | D858_gp055 | - |
| SaPh711_gp072 | D858_gp053 | - |
| SaPh711_gp083 | D858_gp083 | - |
| SaPh711_gp085 | D858_gp045 | - |
| SaPh711_gp094 | D858_gp043 | - |
| SaPh711_gp095 | D858_gp041 | - |
| SaPh711_gp098 | D858_gp037 | - |
| SaPh711_gp100 | D858_gp035 | - |
| SaPh711_gp106 | D858_gp029 | - |
| SaPh711_gp107 | D858_gp028 | - |
| SaPh711_gp108 | D858_gp026 | - |
| SaPh711_gp109 | D858_gp024 | - |
| SaPh711_gp119 | D858_gp016 | - |
| SaPh711_gp120 | D858_gp015 | - |
| SaPh711_gp122 | D858_gp014 | - |
| SaPh711_gp129 | D858_gp013 | - |
| SaPh711_gp130 | D858_gp012 | - |
| SaPh711_gp142 | D858_gp011 | - |
| SaPh711_gp143 | D858_gp010 | - |
| SaPh711_gp144 | D858_gp009 | - |

**Supplementary Table S3. Sequences of predicted late and middle promoters in the phiEco32-like subgroup of phages.**

Sequences of predicted promoter consensus elements are indicated on the left; late promoters are indicated by red-colored font, middle promoter promoters are indicated in green. Promoters numbers match the number of a gene in front of which the promoter is located.

|           | <b>phiEco32</b> | <b>NJ01</b>     | <b>ECBP2</b>    | <b>KBNP1711</b> | <b>SU10</b>     | <b>172-1</b>    |
|-----------|-----------------|-----------------|-----------------|-----------------|-----------------|-----------------|
| TAATGTAgA | P <sub>6</sub>  | P <sub>16</sub> | P <sub>4</sub>  | P <sub>4</sub>  | P <sub>4</sub>  | P <sub>23</sub> |
| TAATGTATA | P <sub>13</sub> | P <sub>23</sub> | P <sub>11</sub> | P <sub>11</sub> | P <sub>11</sub> | P <sub>30</sub> |
| TAATGTATA | P <sub>26</sub> | P <sub>38</sub> | P <sub>24</sub> | P <sub>24</sub> | P <sub>24</sub> | P <sub>43</sub> |
| TAATGTATA | P <sub>40</sub> | P <sub>49</sub> | P <sub>35</sub> | P <sub>35</sub> | P <sub>37</sub> | P <sub>55</sub> |
| TAATGTATA | P <sub>58</sub> | P <sub>67</sub> | P <sub>54</sub> | P <sub>56</sub> | P <sub>56</sub> | P <sub>72</sub> |
| aAATGTATA | P <sub>68</sub> | P <sub>82</sub> | P <sub>66</sub> | P <sub>70</sub> | P <sub>68</sub> | P <sub>87</sub> |

**Supplementary Table S4. Sequences of predicted late promoters in the 7-11 and GAP52 phge genomes subgroup of phages.**

Promoter numbers match the number of a gene, before which the promoter is located. Promoters with lower levels of matching to consensus sequence are highlighted with a grey-colored font.

| <b>7-11</b>     |                      | <b>GAP52</b>     |                      |
|-----------------|----------------------|------------------|----------------------|
| P <sub>1</sub>  | GTAATG - (16) - gCTA | P <sub>1</sub>   | GTAATa - (16) - ACTA |
| P <sub>8</sub>  | GTAAGG - (16) - ACTA | P <sub>107</sub> | GTAATa - (16) - ACTA |
| P <sub>12</sub> | GTAATT - (16) - ACTA | P <sub>98</sub>  | GTAATc - (16) - ACTA |
| P <sub>16</sub> | GTAATT - (16) - ACTA | P <sub>92</sub>  | GTAATa - (16) - ACTA |
| P <sub>22</sub> | GTAAGG - (16) - ACTA | P <sub>86</sub>  | GTAAGa - (16) - ACTA |
| P <sub>28</sub> | GTAAGG - (16) - ACTA | P <sub>71</sub>  | GTAAGa - (16) - ACTA |
| P <sub>48</sub> | GTAAGT - (16) - ACTA | P <sub>59</sub>  | GTAAGa - (16) - ACTA |
| P <sub>69</sub> | GTAAGT - (16) - ACTA | P <sub>48</sub>  | GTAAGG - (16) - ACTA |
| P <sub>84</sub> | GTAATG - (17) - ACTA | P <sub>46</sub>  | GTAATG - (16) - ACTA |
